# Supplementary material for: Organic–inorganic hybrid materials constructed from inorganic lanthanide sulfate skeletons and organic 4,5-imidazoledicarboxylic acid
Source: Royal Society of Chemistry journal article supplement (doi:10.1039/b706072f), 2007-01-01
Supplement: b706072f.pdf [file b706072f.pdf]

*Supporting information*

**Organic-Inorganic Hybrid Materials Constructed from Inorganic Lanthanide Sulfate Skeletons and Organic 4, 5-imidazoledicarboxylic acid**

**Yan-Qiong Sun,<sup>a</sup> and Guo-Yu Yang<sup>\*,a,b</sup>**

<sup>a</sup>*State Key Laboratory of Structural Chemistry, Fujian Institute of Research on the Structure of Matter, Chinese Academy of Sciences, Fuzhou, Fujian 350002, China;* <sup>b</sup> *State Key Laboratory of Rare Earth Materials Chemistry and Applications, Peking University, Beijing 100871, China*

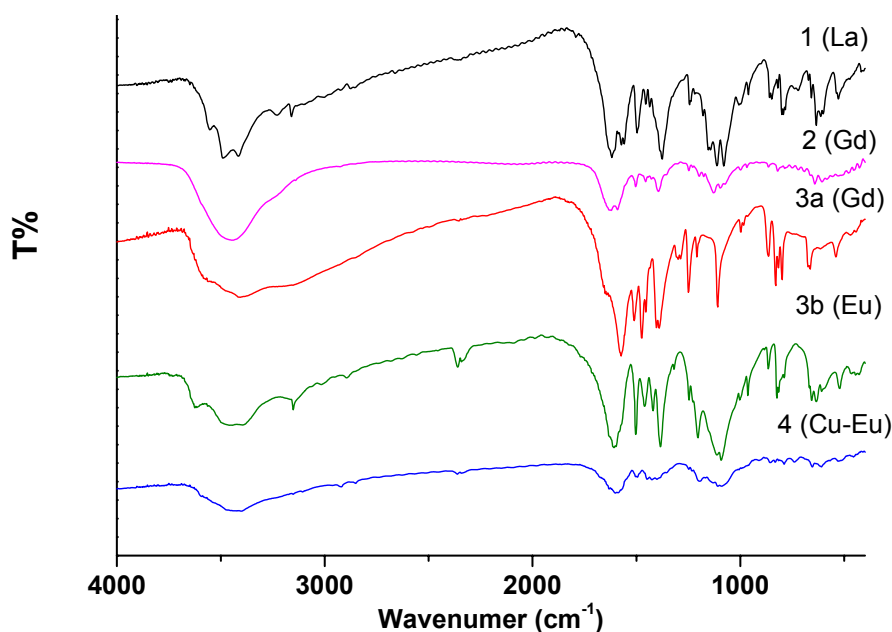

(a)

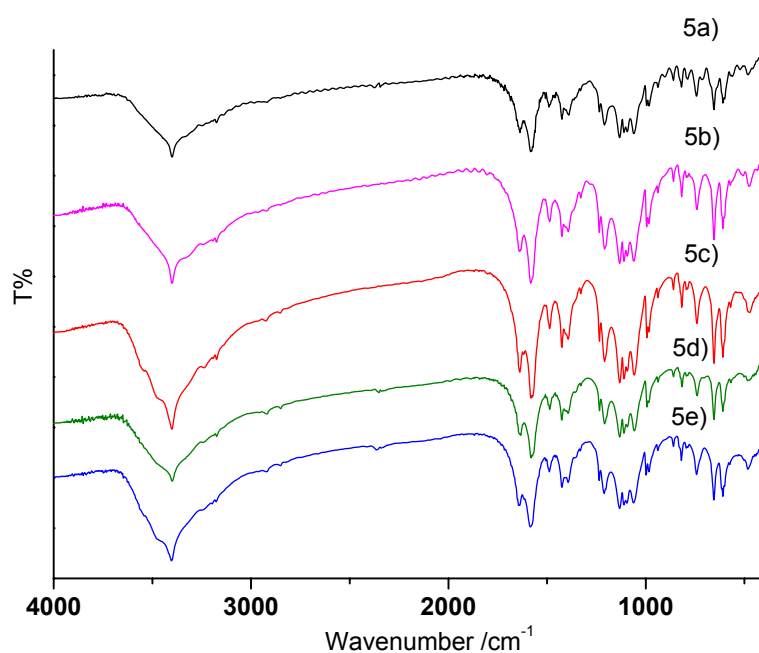

(b)

**Figure S1.** (a) IR spectra of  $\text{La}_2(\text{SO}_4)(\text{Himdc})_2(\text{H}_2\text{O})_2$  (**1**),  $[\text{Gd}_2(\text{SO}_4)_2(\text{Himdc})(\text{H}_2\text{O})_3] \cdot \text{H}_2\text{O}$  (**2**),  $[\text{Ln}_2(\text{SO}_4)_2(\text{Himdc})_2(\text{H}_2\text{O})_3] \cdot \text{H}_2\text{O}$  ( $\text{Ln} = \text{Gd}$  **3a**,  $\text{Eu}$  **3b**),  $[\text{Eu}_6\text{Cu}(\text{SO}_4)_6(\text{Himdc})_4(\text{H}_2\text{O})_{14}]$  (**4**). (b) IR spectra of  $[\text{Ln}(\text{Himc})(\text{SO}_4)(\text{H}_2\text{O})]$  ( $\text{Ln} = \text{Eu}$  **5a**,  $\text{Dy}$  **5b**,  $\text{Tb}$  **5c**,  $\text{Gd}$  **5d**,  $\text{Er}$  **5e**).

In Figure S1a, the peak around 3400 cm<sup>-1</sup> corresponds to the stretching bands of N-H, indicating that the ligand have been deprotonated to generate Himdc<sup>2-</sup>. The peaks around 1600 cm<sup>-1</sup> correspond to the stretching bands of C=O. The strong broad bands at 1104 cm<sup>-1</sup> can be assigned to the stretching vibrations of SO<sub>4</sub><sup>2-</sup>. In Figure S1b, the sharp peak at 3400 cm<sup>-1</sup> corresponds to the stretching bands of N-H, indicating that the H<sub>2</sub>imc ligand have been deprotonated to

generate Himc ligand. The peaks at 1637 and 1582  $\text{cm}^{-1}$  correspond to the stretching bands of C=O. The strong bands at the region of 1132-1052  $\text{cm}^{-1}$  can be assigned to the stretching vibrations of  $\text{SO}_4^{2-}$  group.

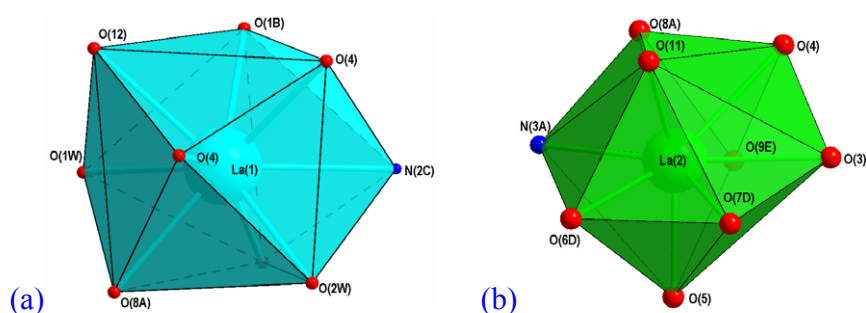

**Figure S2.** The polyhedral representation of the coordination environments of La(1) (a) and La(2) (b) atoms in **1**, (Symmetry code: A:  $-x, y+1/2, -z+1/2$ ; B:  $-x+1, -y+2, -z$ ; C:  $-x+1/2, y+1/2, z$ ; D:  $x+1/2, y, -z+1/2$ ; E:  $x-1, y, z$ ).

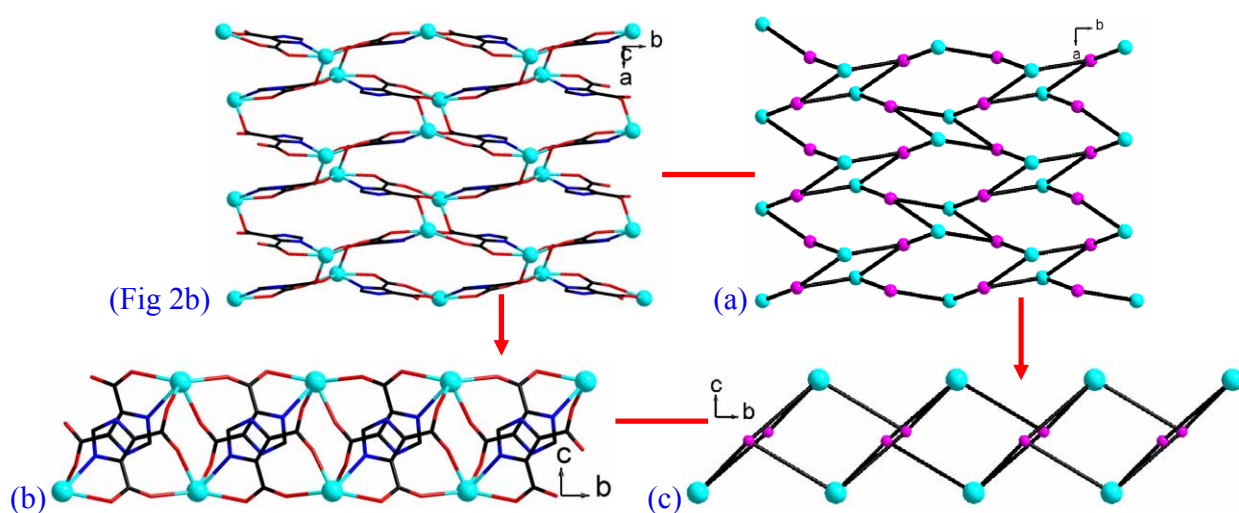

**Figure S3.** The 2D layer constructed from La(1) and Himc<sub>mode 1a</sub> viewed along the *c* axis in **1** (Fig 2b); The topology of 2D layer with  $4.8^2$  net viewed along the *c* axis (a); The 2D layer viewed along the *a* axis (b); The topology of 2D layer with  $4.8^2$  net viewed along the *a* axis (c). Key: cyan, La(1); black, C; blue, N; red, O. The Himc<sub>mode 1a</sub> units are denoted by purple spheres. La(1) ions and Himc<sub>mode 1a</sub> ligands function as 3-connected nodes in the net.

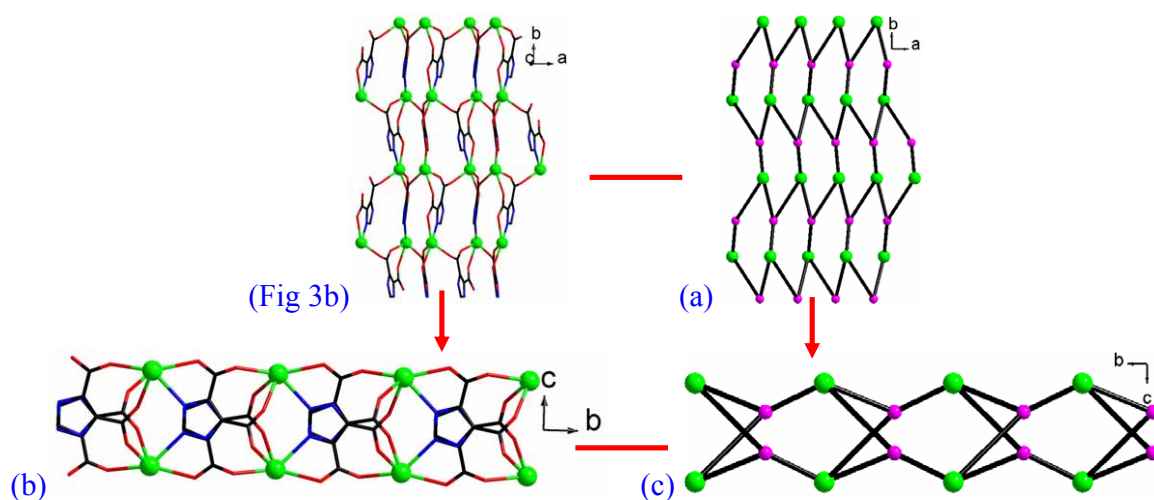

**Figure S4.** The 2D layer constructed from La(2) and Himdc<sub>mode 1b</sub> viewed along the *c* axis in **1** (Figure 3b); The topology of 2D layer with (6, 3) net viewed along the *c* axis (a); The 2D layer viewed along the *a* axis (b); The topology of 2D layer with (6, 3) net viewed along the *a* axis (c). Key: green, La(2); black, C; blue, N; red, O. The Himdc<sub>mode 1b</sub> units are denoted by purple spheres. La(2) ions and Himdc<sub>mode 1b</sub> units function as 3-connected nodes in the net.

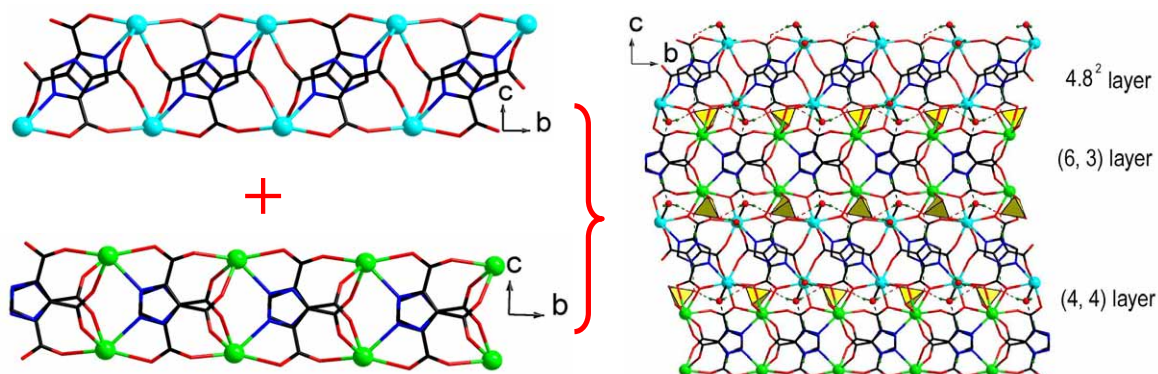

**Figure S5.** The construction of the packing structure (Right: Figure 4) in combination of {La(1)(Himdc<sub>mode 1a</sub>)} layer with 4.8<sup>2</sup> net (Left: top) and {La(2)(Himdc<sub>mode 1b</sub>)} layer (Left: bottom) in **1**.

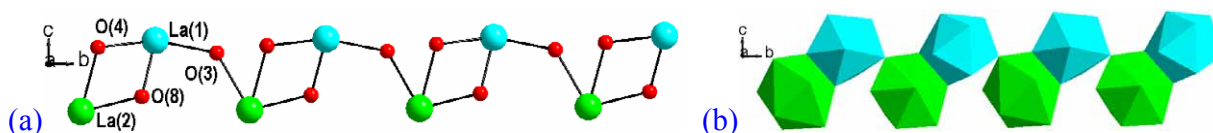

**Figure S6.** View of the inorganic {La<sub>2</sub>O<sub>2</sub>} chain running along the [010] direction in **1**: (a) the ball-stick representation; (b) the polyhedral representation. Color: Cyan, La(1); green, La(2); red, O.

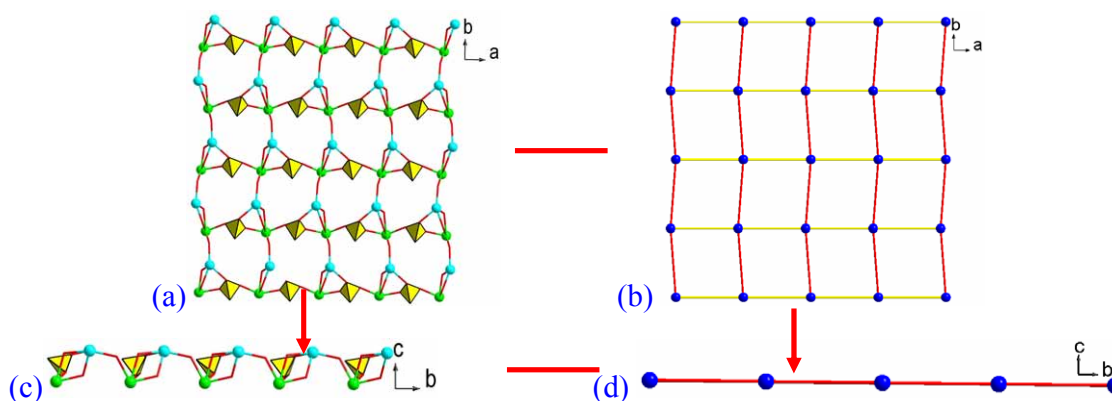

**Figure S7.** The 2D inorganic layer constructed from inorganic chains and SO<sub>4</sub><sup>2-</sup> anions viewed along the *c* axis in **1** (a); The topology of 2D layer with (4,4) net viewed along the *c* axis (b); The 2D layer viewed along the *a* axis (c); The topology with (4,4) net viewed along the *a* axis (d). Key: green, La(2); yellow, S; red, O. The La<sub>2</sub>O<sub>2</sub> units as 4-connected nodes are denoted by blue spheres, and the red and yellow lines represent μ<sub>2</sub>-O(3) and SO<sub>4</sub><sup>2-</sup> anions linkers.

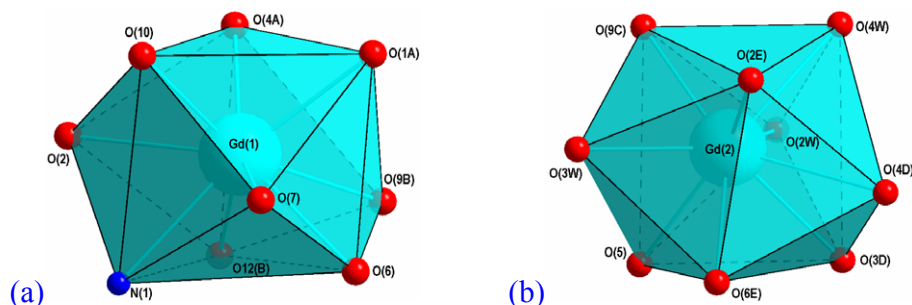

**Figure S8.** The polyhedral representation of the coordination environments of Gd(1) (a) and Gd(2) (b) atoms in **2**. Atoms having “A”, “B” and “C” in their labels are symmetry-generated. Symmetry code: A:  $-x+2, y-1/2, -z+1/2$ ; B:  $x, -y+1/2, z-1/2$ ; C:  $-x+1, -y, -z$ ; D:  $-x+1, -y+1, -z$ ; E:  $x-1, -y+1/2, z-1/2$ . Both Gd(1) and Gd(2) ions are nine-coordinated in a tricapped trigonal prism.

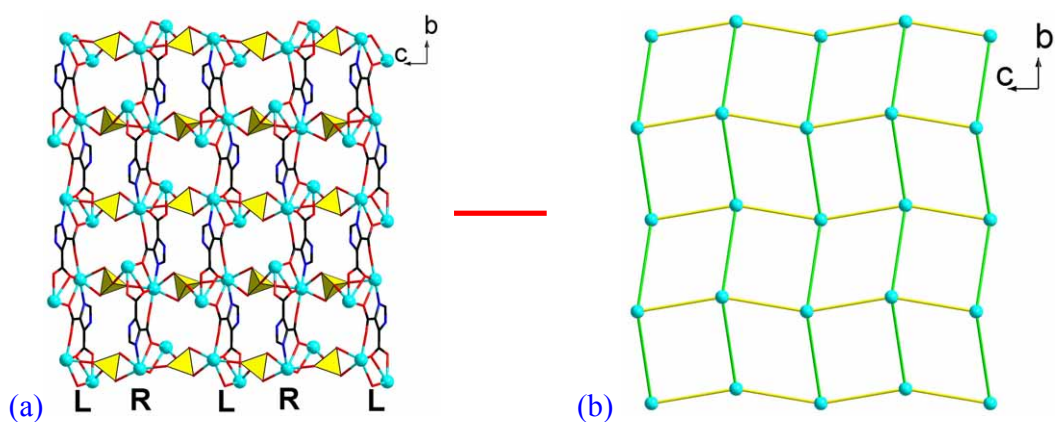

**Figure S9.** (a) View of the 2D grid layer in **2** along the  $a$  axis constructed from the alternately connection of left- and right-handed chain by  $\text{SO}_4^{2-}$  anions. Key: cyan, Gd; black, C; blue, N; red, O; yellow: S. (b) The topology of the 2-D layer with (4, 4)-net. The  $[\text{Gd}_2\text{O}_2]$  units as 4-connected nodes are denoted by cyan spheres, and the yellow and green lines represent  $\text{S}(1)\text{O}_4^{2-}$  anions and Himdc linkers.

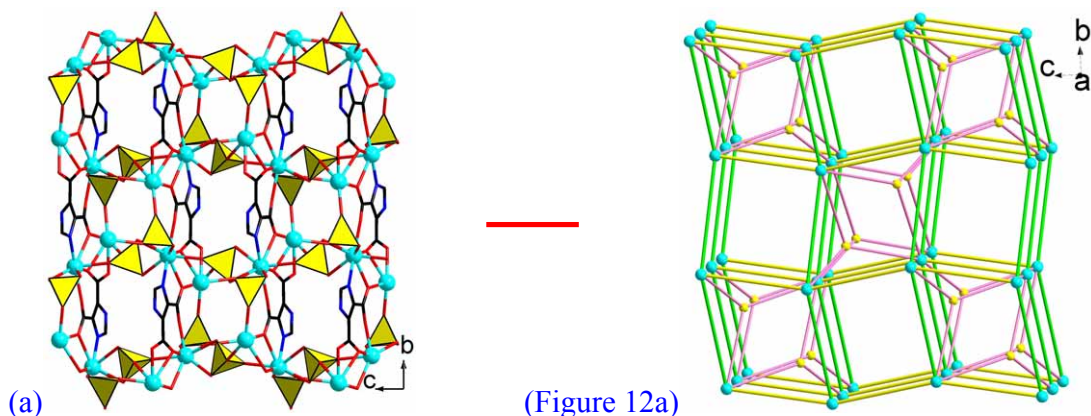

**Figure S10.** (a) View of 3D framework in **2** along the  $a$  axis. Key: cyan, Gd; black, C; blue, N; red, O; yellow: S. (Right: Figure 12a) The topology of the 3D framework of **2**, showing the stacking of layers along the  $[100]$  direction in an -AAAA- sequence. The  $[\text{Gd}_2\text{O}_2]$  units as 4-connected nodes are denoted by cyan spheres, and the yellow and green lines represent  $\text{S}(1)\text{O}_4^{2-}$  anions and Himdc linkers.



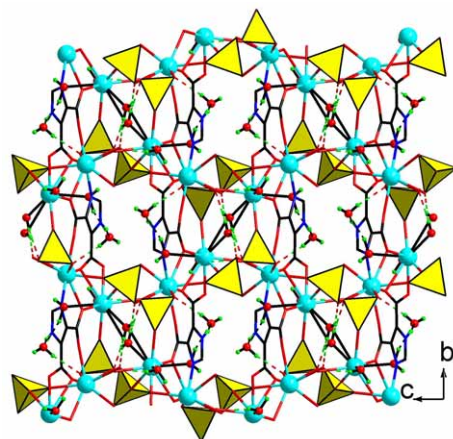

**Figure S11.** The H-bonding network in the structure of **2**. Key: cyan, Gd; black, C; blue, N; red, O; yellow: S.

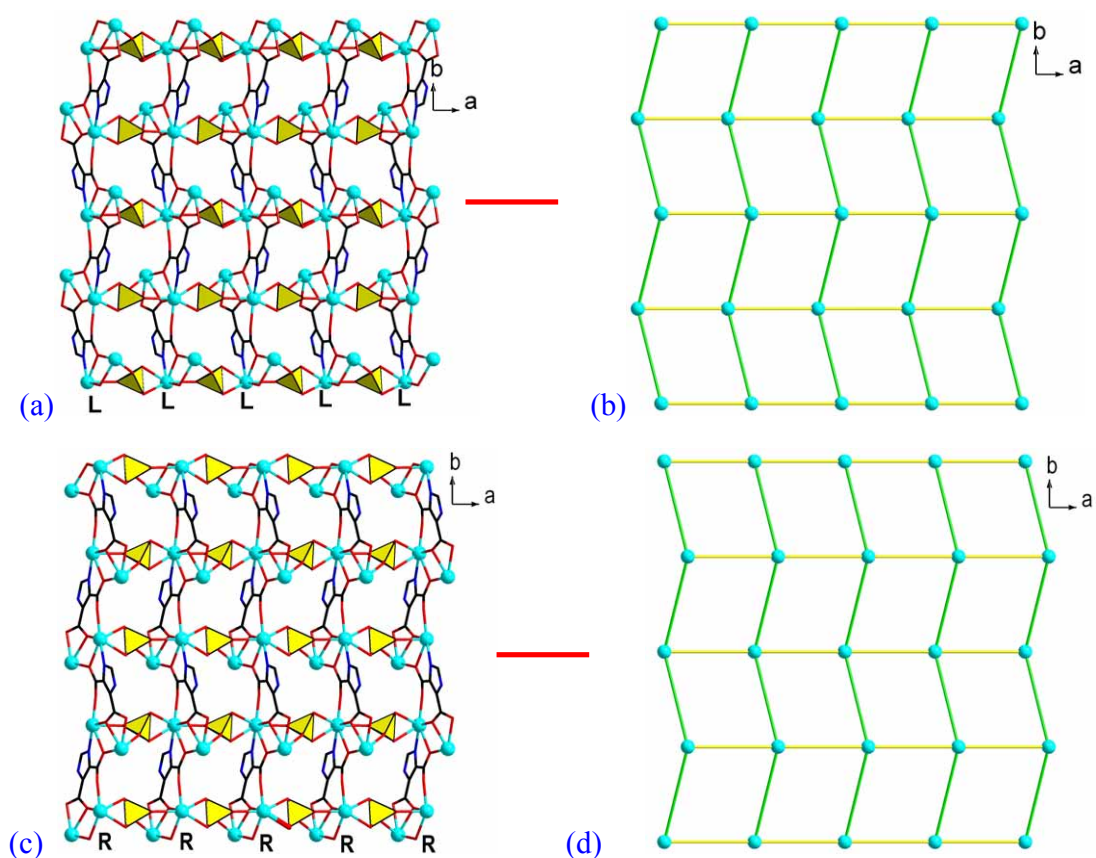

**Figure S12.** (a) View of the 2D grid layer in **3a** along the  $c$  axis made of single left-handed chains and  $\text{SO}_4^{2-}$  anions. (b) The topology of the 2D layer made of single left-handed chains and  $\text{SO}_4^{2-}$  anions with (4, 4)-net. (c) View of the 2D grid layer in **3a** made of single right-handed chains and  $\text{SO}_4^{2-}$  anions. (d) The topology of the 2D layer made of single right-handed chains and  $\text{SO}_4^{2-}$  anions. Key: cyan, Gd; black, C; blue, N; red, O; yellow: S. The  $[\text{Gd}_2\text{O}_2]$  units as 4-connected nodes are denoted by cyan spheres, and the yellow and green lines represent  $\text{S}(1)\text{O}_4^{2-}$  anions and Himdc linkers.

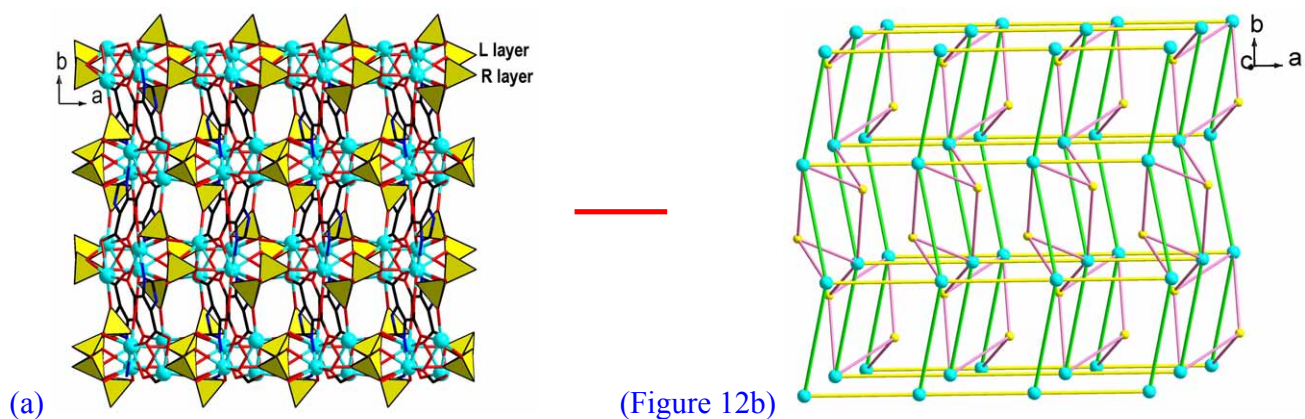

**Figure S13.** (a) View of 3-D framework in **3a** along the *c* axis. (Right: Figure 12b) The topology of the 3D framework of **3a**, showing the alternately connection of left- and right-handed layers by  $\text{SO}_4^{2-}$  anions. Key: cyan, Gd; black, C; blue, N; red, O; yellow: S. The  $[\text{Gd}_2\text{O}_2]$  units as 4-connected nodes are denoted by cyan spheres, and the yellow and green lines represent  $\text{S}(1)\text{O}_4^{2-}$  anions and Himdc linkers.

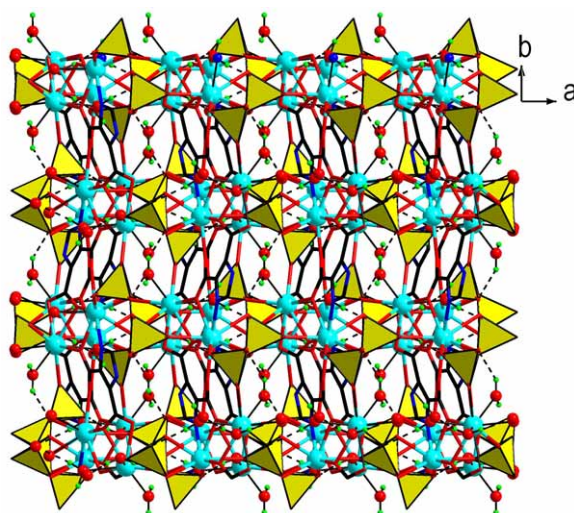

**Figure S14.** The H-bonding network in the structure of **3a**. Key: cyan, Gd; black, C; blue, N; red, O; yellow: S.

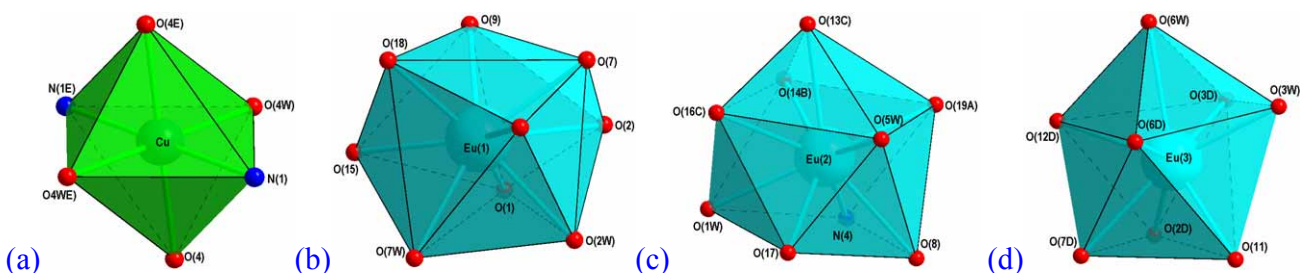

**Figure S15.** The polyhedral representation of the coordination environments of Cu (a), Eu(1) (b), Eu(2) (c) and Eu(3) (d) atoms in **4**.

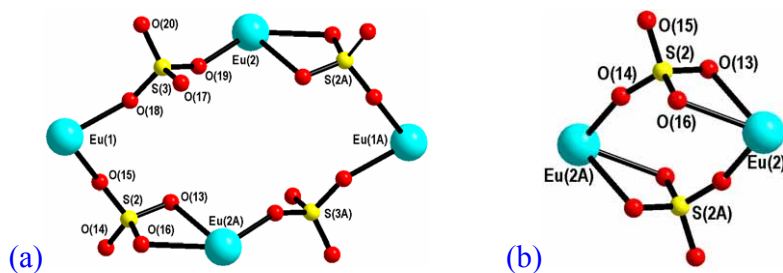

**Figure S16.** Ball-stick representation of the 8-membered ring (a) and 4-membered ring (b) in 4.

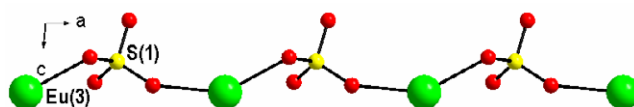

**Figure S17.** 1D {EuSO<sub>4</sub>} chain constructed from Eu(3)<sup>3+</sup> and S(1)O<sub>4</sub><sup>2-</sup> anions running along the *a* axis in 4.

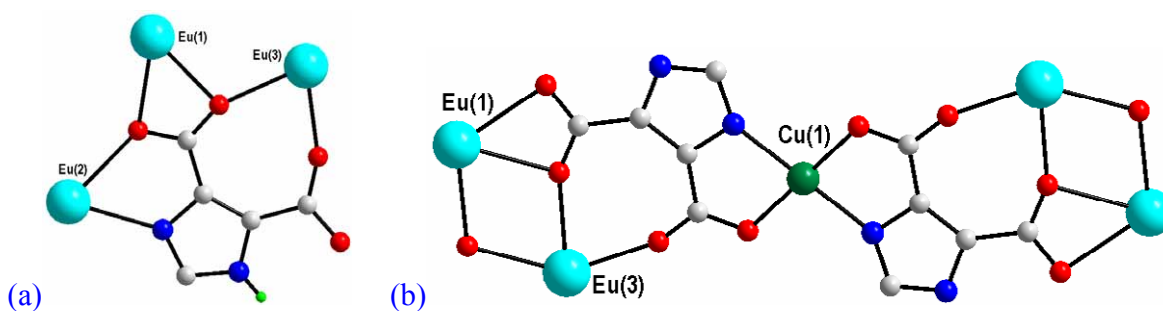

**Figure S18.** Coordination modes of Himdc in 4: (a) behaving as an ancillary ligand chelated with the Eu atoms to decorate the 2D tubular layer; (b) Coordinated to Cu atoms to form [Cu(Himdc)<sub>2</sub>] complexes, which support the adjacent tubular layers to generate the 3D open framework. Key: cyan, Eu; black, C; blue, N; red, O; green, Cu.

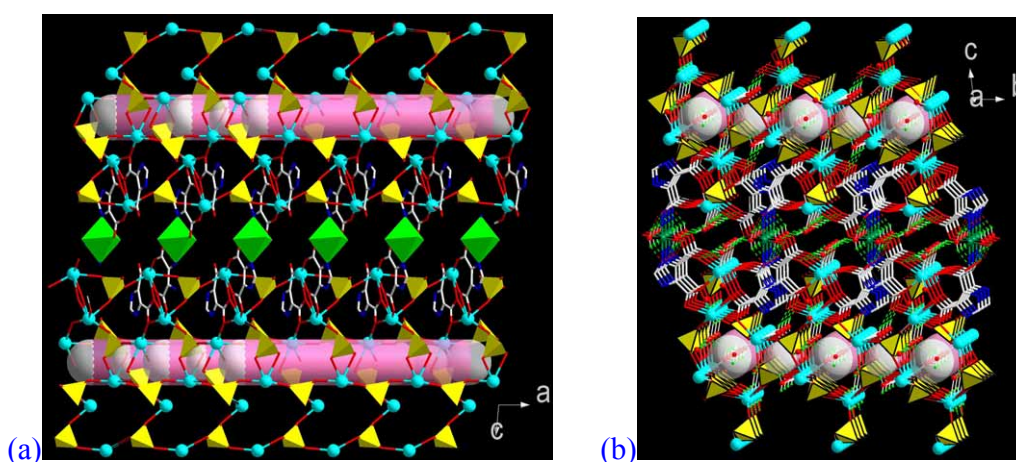



**Figure S19.** (a) The stacking of **4** viewed along the *b* axis, showing the 1D channels. (b) The 3D framework of **4** viewed along the approximate the *a* axis, showing the H-bond network. Key: cyan, Eu; black, C; blue, N; red, O; yellow: S; green, Cu.

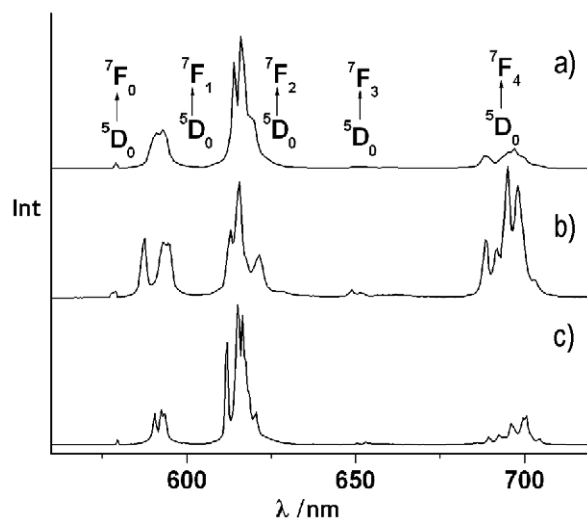

**Figure S20.** Emission spectra of **3b**(a), **4**(b) and **5a** (c) in solid state at room temperature (all excitation at 394 nm).

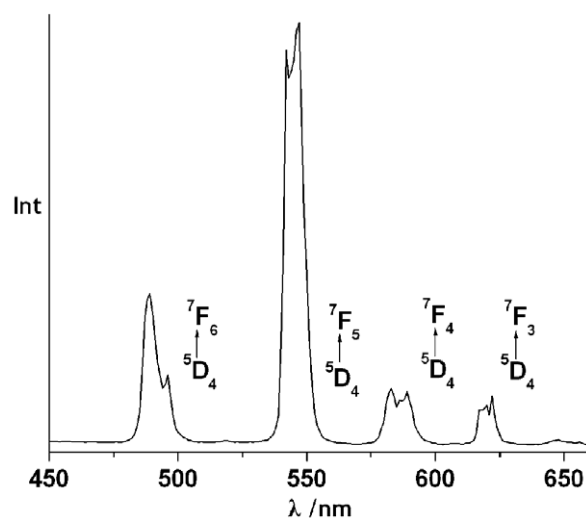

**Figure S21.** Emission spectra of **5c** in solid state at room temperature (excitation at 344nm).

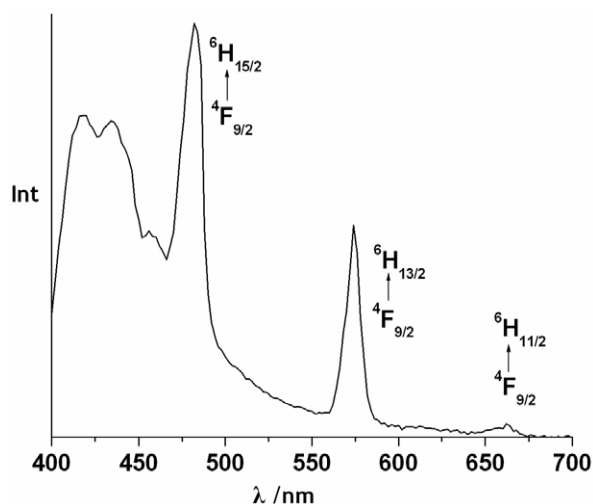

**Figure S22.** Emission spectra of **5d** in solid state at room temperature (excitation at 352nm).

**Luminescent Properties.** Complex **3b** yields intense red luminescence (Figure S20a) and exhibits the characteristic transition of  ${}^5D_0 \rightarrow {}^7F_J$  ( $J = 0-4$ ) of the  $\text{Eu}^{3+}$  ion with a decay lifetime of 209.4  $\mu\text{s}$  for  ${}^5D_0 \rightarrow {}^7F_2$ . It can be seen that the intensity ratio of  ${}^5D_0 \rightarrow {}^7F_2$ / ${}^5D_0 \rightarrow {}^7F_1$  is 3.4 which indicates that the  $\text{Eu}^{3+}$  ions are not in an inversion center, which further confirms by the appearance of the symmetric forbidden emission  ${}^5D_0 \rightarrow {}^7F_0$  at 579 nm. This is in agreement with the result of the single crystal X-ray analysis. It is noticed that the bands originated from the  ${}^5D_0 \rightarrow {}^7F_3$  transition is of low intensity and may be taken as forbidden. The luminescent properties of lanthanide complexes are very dependant on the local environments around the lanthanide centres, such as the coordinating ligand, symmetry of the ligand filed, and related coordination environments. When **4** was excited at 394 nm, the characteristic red emission spectra were recorded at 580, 594, 615, 649, and 695 nm, which are ascribed to the transition of  ${}^5D_0 \rightarrow {}^7F_J$  ( $J=0-4$ ), respectively with a decay lifetime of 337.0  $\mu\text{s}$  for  ${}^5D_0 \rightarrow {}^7F_2$  (Figure S20b). The intensity of the  ${}^5D_0 \rightarrow {}^7F_0$  transition is relative weak and the emission band is not symmetrical, which suggests that the  $\text{Eu}^{3+}$  are not in an inversion centers. The splitting of the two Stark components of the  ${}^7F_1$  multiplet indicates the presence of more than one chemically different  $\text{Eu}^{3+}$  ion sites. The intensities of  ${}^5D_0 \rightarrow {}^7F_{2,4,6}$  transitions are strongly dependent on the odd-parity components of the crystal field. Different from **3b**, the  ${}^5D_0 \rightarrow {}^7F_4$  is the strongest one in the five transitions in **4**, which is very interesting and rarely observed in Eu complexes. The result shows that  $\text{Eu}^{3+}$  ions have lower symmetric coordination environment in **4**. This is in agreement with the result of the single crystal X-ray analysis. In general, the luminescent intensity of the  $\text{Ln}^{3+}$  depends on the efficiency of the energy transfer. The difference of the emission spectra of **3b** and **4** may result from the incorporation of  $\text{Cu}^{2+}$  ions in **4**, which make the energy transfer process of  ${}^5D_0 \rightarrow {}^7F_4$  more effective. **5a** yields intense red luminescence (Figure S20c) and exhibits the characteristic transition of  ${}^5D_0 \rightarrow {}^7F_J$  ( $J=0-4$ ) of the  $\text{Eu}^{3+}$  ion with a decay lifetime of 256  $\mu\text{s}$  for  ${}^5D_0 \rightarrow {}^7F_3$ . The  ${}^5D_0 \rightarrow {}^7F_0$  transition observed as a weak peak at 579 nm reveals the presence of the  $\text{Eu}^{3+}$  site with low symmetry. The  ${}^5D_0 \rightarrow {}^7F_2$  transition is clearly stronger than the  ${}^5D_0 \rightarrow {}^7F_1$ , the intensity ratio of 3.9 for  $I({}^5D_0 \rightarrow {}^7F_2)/I({}^5D_0 \rightarrow {}^7F_1)$ , which indicates the absence of inversion center at  $\text{Eu}^{3+}$  site. This is in agreement with the result of the single crystal X-ray analysis.

Complex **5c** is green-luminescent (Figure S21) in solid state with a typical  $\text{Tb}^{3+}$  emission at 489, 547, 583 and 622 nm, corresponding to the characteristic emission  ${}^5D_4 \rightarrow {}^7F_J$  ( $J = 6-3$ ) transitions of  $\text{Tb}^{3+}$  ion. The spectrum is dominated by the  ${}^5D_4 \rightarrow {}^7F_5$  transition, at 547 nm, which gives an intense green luminescence output for the solid sample. The lifetime of complex **5c** for  ${}^5D_4 \rightarrow {}^7F_5$  is 0.49 ms. No emission bands from the ligands or LMCT are observed in complexes **5a** and **5c**, indicating that the Hmc ligands transfer the excitation energy efficiently to the  $\text{Eu}^{3+}$  and  $\text{Tb}^{3+}$  centers. Two emission groups for **5d** in the range of 400-450 and 450-680 nm are shown in Figure S22. The emission at 482, 574 and 662 nm (decay lifetime = 0.946  $\mu\text{s}$  for the transition of  ${}^4F_{9/2} \rightarrow {}^6H_{15/2}$ ) is attribute to the characteristic emission of  ${}^4F_{9/2} \rightarrow {}^6H_J$  ( $J = 15/2, 13/2$  and  $11/2$ ) transitions of  $\text{Dy}^{3+}$  ion. It is obvious that the intensity of the blue emission corresponding to  ${}^4F_{9/2} \rightarrow {}^6H_{15/2}$  transition is much stronger than that of the yellow one, which indicates that  $\text{H}_2\text{imc}$  acts as a better sensitizer to the blue  $\text{Dy}^{3+}$  emission, unlike the previously reported imdc-based  $\text{Dy}^{3+}$  complex which gives predominantly yellow luminescence. The large broad blue-shift band ranging 400 to 450 nm would be assigned to the emission of ligand-to-metal charge transfer (LMCT). The intensity of the metal centered transitions is strong, relatively

to that of the broad LMCT band, which actually implies that direct metal excitation is comparable with the sensitized process, as the extinction coefficients of the metal emission are much lower than that of the ligands.

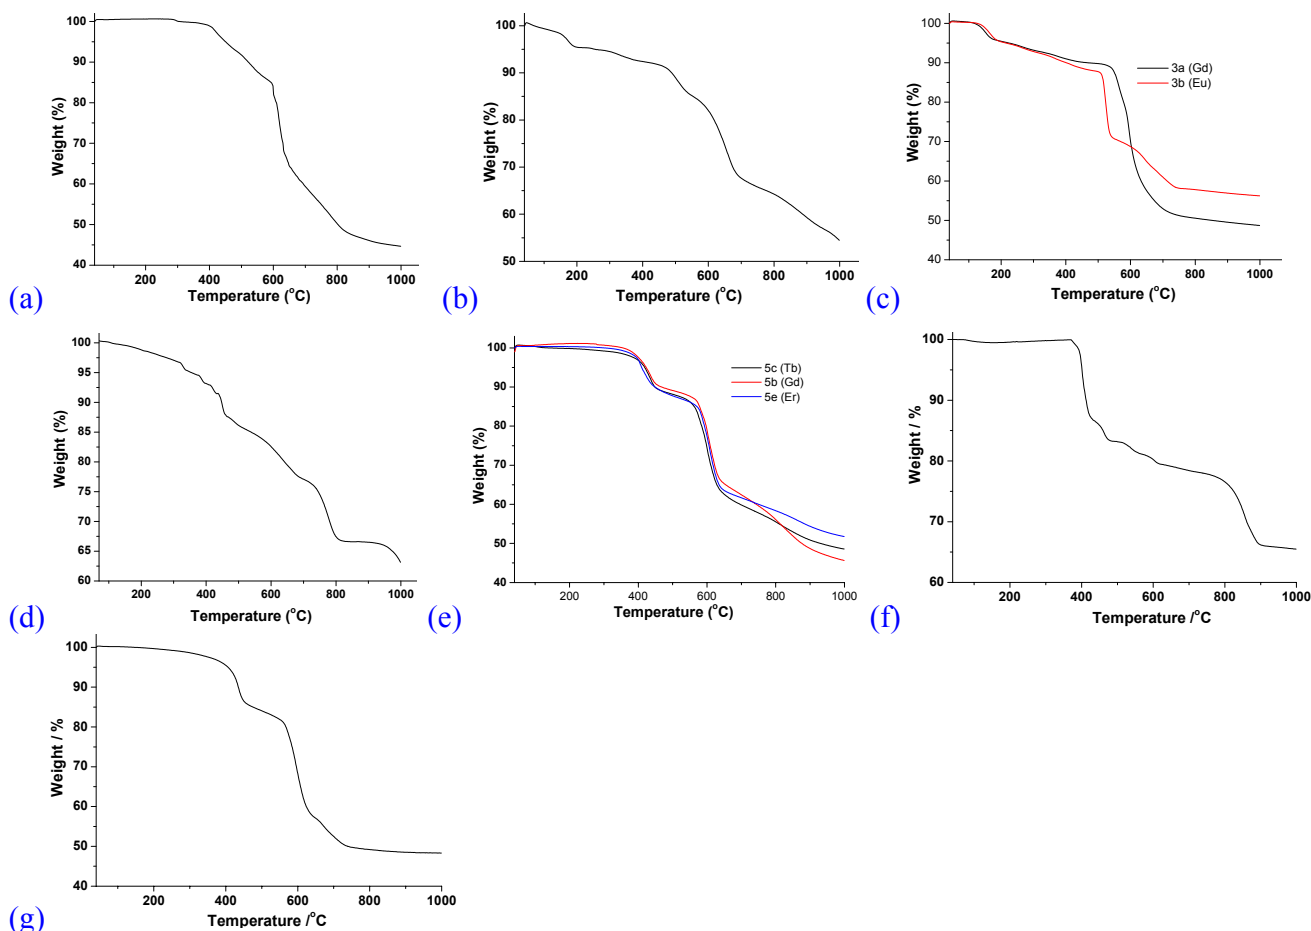

**Figure S23.** TG curves for **1** (a), **2** (b), **3a/3b** (c), **4** (d), **5b/5c/5e** (e), **5a** (f) and **5d** (g) under air atmosphere (10 °C/min).

Thermogravimetric analyses of these materials were performed to investigate their thermal stability. In the TG curve of **1**, there is only one weight loss of 54.8% in the temperature rang 300-950 °C, corresponding to the successive release of two coordinated waters, decomposition of two Himdc and departure of one  $\text{SO}_4^{2-}$  anion as  $\text{SO}_3$ . Assuming that the residue corresponds to  $\text{La}_2\text{O}_3$ , the observed total weight loss (45.2%) is in agreement with the calculated value (45.4%) (Figure S23a).

The TG curve of **2** shows that the initial weight loss between 70 and 200 °C corresponds to the release of one lattice water molecule and one coordinated water molecule per formula unit (calcd/found: 4.9/4.6%). Then, further decomposition of **2** begins above 200 °C, and the residues at 1000 °C might be  $\text{Gd}_2\text{O}(\text{SO}_4)_2$ <sup>1</sup> (obsd/calcd: 54.5/54.9%), a mixture containing 1/2  $\text{Gd}_2\text{O}_2(\text{SO}_4)$  and 1/2  $\text{Gd}_2(\text{SO}_4)_3$  (Figure S23b).

TGA of **3a** shows three regions of weight loss. The first, a mass loss of 4.6% from 100 to 200 °C, corresponds to the loss of one lattice water molecule and one coordinated water molecule (calcd 4.9%). Then, the weight loss between 200 and 450 °C is assigned to the removal of the remaining two coordinated water molecules (calcd/found: 4.9/5.3%). Above this temperature, the complex begins to decompose, and at 900 °C the residue is  $\text{Gd}_2\text{O}_3$  (calcd/found: 49.5/49.5%) (Figure S23c).

As shown in Figure S23c, compound **3b** also shows three regions of weight loss. The first, a mass loss of 4.7% for **3b** from 100 to 200°C, corresponds to the loss of one lattice water molecule and one coordinated water molecules (calcd 5.0% for **3b**). Then, the weight loss between 200 and 400 °C for **3b** is assigned to the removal of the remaining two

coordinated water molecules (calcd/found: 5.0%/5.2% for **3b**). Above the temperature, the compounds begin to decompose, and at 740°C the residue of **3b** is  $\text{Eu}_2\text{O}_2(\text{SO}_4)$  (calcd/found: 59.8/58.4%).

The TG plot of **4** shows that only one weight loss is observed between 100 and 830 °C, which is assigned to the successive removal of one coordinated water and one Himdc. The residues at 830 °C have a composition of  $[\text{Eu}_6\text{CuO}_4(\text{SO}_4)_6]$  corresponding to  $2\text{Eu}_2(\text{SO}_4)_3 \cdot \text{Eu}_2\text{O}_3 \cdot \text{CuO}$  (calcd/found: 66.8/66.6%). Then the residues keep stable and at 930 °C begin to decompose (Figure S23d).

The TG curve of **5a** also displays two continuous weight loss stages in the range of 350-1000 °C, corresponding to the successive release of one coordination water molecule and one ligand per formula unit (obsd/calcd: 33.8/32.1%). The 66.2% white residue is close to the weight of  $\text{Eu}_2\text{O}(\text{SO}_4)_2$  (calcd: 67.9%). The  $\text{Eu}_2\text{O}(\text{SO}_4)_2$  might be a mixture containing 1/2  $\text{Eu}_2(\text{SO}_4)_3$  and 1/2  $\text{Eu}_2\text{O}_2(\text{SO}_4)$  (Figure S23f).

As shown Figure S23e, the TG curves of **5b** and **5e** show similar thermal behavior and undergo one weight loss, corresponding to the release of one coordination water molecule and one ligand, and/or the departure of one sulfate as  $\text{SO}_3$  per formula unit. The residue had a composition of  $\text{Gd}_2\text{O}_3$  for **5b** at 930°C (calcd/found: 47.4/47.8%);  $\text{Er}_2\text{O}_2\text{SO}_4$  for **5e** at 800 °C (calcd/found: 58.9/58.3%).

The TG curve of **5c** displays the weight loss of 51.4 % (calcd 51.3%) from 140-1000 °C corresponds to the release of one coordination water molecule and one ligand, and/or the departure of one sulfate as  $\text{SO}_3$  per formula unit. The 48.6% white residue might be  $\text{Tb}_4\text{O}_7$  (calcd: 48.7%) per formula unit (Figure S23e).

In the TG curve of **5d** shows two continuous weight loss stages in the range of 150-900 °C, corresponding to the successive release of one coordination water molecule, one ligand and/or the departure of one sulfate as  $\text{SO}_3$  per formula unit (obsd/calcd: 51.7/51.9%). The 48.3% white residue might be  $\text{Dy}_2\text{O}_3$  (calcd: 48.1%) (Figure S23g).

1. T. Bataille and D. Louër, *J. Solid State Chem.*, 2004, **177**, 1235.

**Table S1.** Crystal data and Structure Refinements for Compounds **3a-5e**

|                       | <b>3b</b>                                                             | <b>5b</b>                                            | <b>5c</b>                                            | <b>5d</b>                                            | <b>5e</b>                                            |
|-----------------------|-----------------------------------------------------------------------|------------------------------------------------------|------------------------------------------------------|------------------------------------------------------|------------------------------------------------------|
| Formula               | $\text{C}_5\text{H}_{10}\text{Eu}_2\text{N}_2\text{O}_{16}\text{S}_2$ | $\text{C}_4\text{H}_5\text{GdN}_2\text{O}_7\text{S}$ | $\text{C}_4\text{H}_5\text{N}_2\text{O}_7\text{STb}$ | $\text{C}_4\text{H}_5\text{DyN}_2\text{O}_7\text{S}$ | $\text{C}_4\text{H}_5\text{ErN}_2\text{O}_7\text{S}$ |
| Fw                    | 722.21                                                                | 382.41                                               | 384.08                                               | 387.66                                               | 392.42                                               |
| Crystal system        | Monoclinic                                                            | Monoclinic                                           | Monoclinic                                           | Monoclinic                                           | Monoclinic                                           |
| Space group           | P21/c                                                                 | P21/c                                                | P21/c                                                | P21/c                                                | P21/c                                                |
| a/Å                   | 6.602 (1)                                                             | 11.207(1)                                            | 11.181(1)                                            | 11.157(3)                                            | 11.147(1)                                            |
| b/Å                   | 13.324(1)                                                             | 6.525 (1)                                            | 6.498(1)                                             | 6.479(2)                                             | 6.447(1)                                             |
| c/Å                   | 18.880(1)                                                             | 12.182(1)                                            | 12.132(1)                                            | 12.087(3)                                            | 12.039(1)                                            |
| $\beta/^\circ$        | 106.62(1)                                                             | 107.91(1)                                            | 107.82(1)                                            | 107.82(1)                                            | 107.77 (1)                                           |
| V/Å <sup>3</sup>      | 1591.4(2)                                                             | 847.7(1)                                             | 839.1 (1)                                            | 831.8(4)                                             | 823.9(1)                                             |
| Z                     | 4                                                                     | 4                                                    | 4                                                    | 4                                                    | 4                                                    |
| Dc/g cm <sup>-3</sup> | 3.014                                                                 | 2.996                                                | 3.040                                                | 3.096                                                | 3.164                                                |
| $\mu/\text{mm}^{-1}$  | 8.166                                                                 | 8.091                                                | 8.698                                                | 9.256                                                | 10.462                                               |
| F(000)                | 1360                                                                  | 716                                                  | 720                                                  | 724                                                  | 732                                                  |



|                |        |        |        |        |        |
|----------------|--------|--------|--------|--------|--------|
| S(F2)          | 1.110  | 1.146  | 1.113  | 1.014  | 1.208  |
| R1,(I>2σ (I))  | 0.0288 | 0.0347 | 0.0269 | 0.0204 | 0.0314 |
| wR2 (I>2σ (I)) | 0.0735 | 0.0869 | 0.0667 | 0.0441 | 0.0777 |

**Table S2.** Geometrical Parameters of Hydrogen Bonds for **type I – type V**.

| D-H       | d(D-H) | d(H..A) | <DHA | d(D..A) | A   |                       |
|-----------|--------|---------|------|---------|-----|-----------------------|
| <b>1</b>  |        |         |      |         |     |                       |
| N1-H1     | 0.87   | 1.94    | 163  | 2.791   | O10 | [x-1/2, -y+3/2, -z]   |
| N4-H4     | 0.86   | 2.09    | 167  | 2.934   | O1W | [-x+1/2, y-1/2, z]    |
| O1W-H12   | 0.80   | 1.89    | 161  | 2.659   | O10 | [-x+3/2, y+1/2, z]    |
| O1W-H11   | 0.75   | 2.42    | 111  | 2.770   | O12 |                       |
| O2W-H21   | 0.71   | 2.40    | 137  | 2.952   | O12 | [x-1, y, z]           |
| O2W-H22   | 0.64   | 2.18    | 168  | 2.802   | O1  | [-x, -y+2, -z]        |
| <b>2</b>  |        |         |      |         |     |                       |
| N2-H1     | 0.95   | 2.03    | 160  | 2.947   | O1W | [-x+1, -y+1, -z]      |
| O1W-H11   | 0.77   | 2.00    | 169  | 2.766   | O10 | [x, -y+1/2, z-1/2]    |
| O2W-H21   | 0.77   | 2.04    | 153  | 2.749   | O11 |                       |
| O3W-H31   | 0.77   | 2.05    | 149  | 2.737   | O8  | [x-1, -y+1/2, z-1/2]  |
| O3W-H32   | 0.71   | 2.15    | 152  | 2.797   | O11 | [-x+1, -y, -z]        |
| O4W-H42   | 0.93   | 1.86    | 163  | 2.760   | O1W | [-x+1, y-1/2, -z-1/2] |
| <b>3a</b> |        |         |      |         |     |                       |
| N2-H2A    | 0.86   | 2.06    | 165  | 2.891   | O1W | [-x, -y, -z-1]        |
| O2W-H21   | 0.90   | 2.07    | 164  | 2.944   | O6  | [x-1, y, z]           |
| O3W-H31   | 0.90   | 1.90    | 161  | 2.764   | O11 | [x, -y-1/2, z+1/2]    |
| O3W-H32   | 0.89   | 1.86    | 157  | 2.701   | O10 | [x-1, -y-1/2, z+1/2]  |
| O4W-H41   | 0.91   | 2.22    | 120  | 2.796   | O11 | [-x, y+1/2, -z-1/2]   |
| <b>3b</b> |        |         |      |         |     |                       |
| N2-H2A    | 0.86   | 2.07    | 164  | 2.901   | O1W | [-x, -y, -z-1]        |
| O2W-H21   | 0.89   | 2.09    | 162  | 2.945   | O6  | [x-1, y, z]           |
| O3W-H31   | 0.90   | 1.90    | 164  | 2.772   | O11 | [x, -y-1/2, z+1/2]    |
| O3W-H32   | 0.85   | 1.90    | 156  | 2.704   | O10 | [x-1, -y-1/2, z+1/2]  |
| O4W-H41   | 0.91   | 2.24    | 120  | 2.805   | O11 | [-x, y+1/2, -z-1/2]   |
| <b>4</b>  |        |         |      |         |     |                       |
| N2-H2A    | 0.86   | 1.96    | 168  | 2.811   | O20 | [x, y+1, z]           |
| N3-H3A    | 0.86   | 2.06    | 162  | 2.889   | O10 | [x-1, y-1, z]         |
| O1W-H11   | 0.85   | 2.29    | 112  | 2.724   | O16 | [-x+2, -y, -z+1]      |
| O1W-H12   | 0.86   | 2.01    | 146  | 2.772   | O1  | [x, y-1, z]           |
| O2W-H21   | 0.89   | 2.13    | 141  | 2.869   | O9  | [x-1, y, z]           |
| O3W-H31   | 0.93   | 2.22    | 133  | 2.931   | O3  | [x+1, y, z]           |
| O3W-H31   | 0.93   | 2.22    | 137  | 2.971   | O6W |                       |
| O4W-H41   | 0.91   | 1.76    | 167  | 2.656   | O5  | [x+1, y+1, z]         |
| O4W-H42   | 0.91   | 2.00    | 153  | 2.845   | O5  | [-x+2, -y, -z]        |
| O5W-H51   | 0.84   | 2.03    | 154  | 2.809   | O7W |                       |
| O6W-H61   | 0.84   | 1.94    | 159  | 2.746   | O4W | [-x+3, -y, -z]        |
| O6W-H62   | 0.83   | 2.25    | 120  | 2.752   | O12 | [x+1, y, z]           |
| O7W-H72   | 0.89   | 1.92    | 150  | 2.721   | O16 |                       |
| O7W-H71   | 0.89   | 1.95    | 155  | 2.782   | O13 | [x-1, y, z]           |
| <b>5a</b> |        |         |      |         |     |                       |
| O1W-H11   | 0.84   | 2.06    | 160  | 2.865   | O4  | [-x, y-1/2, -z+3/2]   |
| O1W-H12   | 0.83   | 1.95    | 174  | 2.773   | O2  | [-x, -y, -z+1]        |
| N1-H1B    | 0.86   | 2.34    | 127  | 2.933   | O4  | [x+1, y, z]           |
| <b>5b</b> |        |         |      |         |     |                       |
| O1W-H11   | 0.85   | 2.05    | 160  | 2.860   | O4  | [-x, y-1/2, -z+3/2]   |
| O1W-H12   | 0.83   | 1.97    | 173  | 2.794   | O2  | [-x, -y, -z+1]        |
| N1-H1B    | 0.86   | 2.33    | 128  | 2.942   | O4  | [x+1, y, z]           |
| <b>5c</b> |        |         |      |         |     |                       |
| O1W-H11   | 0.84   | 2.06    | 160  | 2.862   | O4  | [-x, y-1/2, -z+3/2]   |
| O1W-H12   | 0.83   | 1.95    | 173  | 2.778   | O2  | [-x, -y, -z+1]        |
| N1-H1B    | 0.86   | 2.34    | 127  | 2.939   | O4  | [x+1, y, z]           |
| <b>5d</b> |        |         |      |         |     |                       |
| O1W-H11   | 0.85   | 2.06    | 160  | 2.865   | O4  | [-x, y-1/2, -z+3/2]   |
| O1W-H12   | 0.83   | 1.97    | 173  | 2.795   | O2  | [-x, -y, -z+1]        |
| N1-H1B    | 0.86   | 2.32    | 128  | 2.921   | O4  | [x+1, y, z]           |
| <b>5e</b> |        |         |      |         |     |                       |

|         |      |      |     |       |    |                       |
|---------|------|------|-----|-------|----|-----------------------|
| O1W-H11 | 0.84 | 2.07 | 160 | 2.871 | O4 | $[-x, y-1/2, -z+3/2]$ |
| O1W-H12 | 0.83 | 1.93 | 174 | 2.754 | O2 | $[-x, -y, -z+1]$      |
| N1-H1B  | 0.86 | 2.38 | 125 | 2.955 | O4 | $[x+1, y, z]$         |
